# Supplementary material for: Why In Vitro Fertilization Increases Macrosomia Risk? A New Anti-Cold-Stress Theory Mirroring Bergmann's Evolutionary Adaptation Rule
Source: Research Square preprint supplement (doi:10.21203/rs.3.rs-8284673/v1), 2025-12-15
Supplement: Supplementary file 1 [file ed44a48491d1c0b36c25deb5.xlsx]

## Sheet: Sheet1
>FET_vs_ET	(FET_vs_ET)-Transcript_id	(FET_vs_ET)-Gene_id	(FET_vs_ET)-Gene_Symbol	Degree	(FET_vs_ET)-Max_expression_value	(FET_vs_ET)-log2FoldChange	(FET_vs_ET)-pvalue	(FET_vs_ET)-padj	(FET_vs_ET)-Change	(FET_vs_ET)-Gene_Symbol	>FET_vs_Ctrl	(FET_vs_Ctrl)-Transcript_id	(FET_vs_Ctrl)-Gene_id	(FET_vs_Ctrl)-Gene_Symbol	(FET_vs_Ctrl)-Max_expression_value	(FET_vs_Ctrl)-log2FoldChange	(FET_vs_Ctrl)-pvalue	(FET_vs_Ctrl)-padj	(FET_vs_Ctrl)-Change	>ET_vs_Ctrl	(ET_vs_Ctrl)-Transcript_id	(ET_vs_Ctrl)-Gene_id	(ET_vs_Ctrl)-Gene_Symbol	(ET_vs_Ctrl)-Max_expression_value	(ET_vs_Ctrl)-log2FoldChange	(ET_vs_Ctrl)-pvalue	(ET_vs_Ctrl)-padj	(ET_vs_Ctrl)-Change
>FET_vs_ET	ENST00000519419	ENSG00000169398	PTK2	10	7017.55	-7.37927930599536	8.21895983580987e-06	0.00122831071748664	DOWN	PTK2	>FET_vs_Ctrl									>ET_vs_Ctrl
>FET_vs_ET	ENST00000229471	ENSG00000010810	FYN	7	3484.79	-4.91839997992615	4.29841933335632e-05	0.00588905816853684	DOWN	FYN	>FET_vs_Ctrl									>ET_vs_Ctrl	ENST00000229471	ENSG00000010810	FYN	3326.64	5.10992276944078	5.9368883376707e-05	0.00708422437513924	UP
>FET_vs_ET	ENST00000418647	ENSG00000050820	BCAR1	6	1084.38	3.18817076035057	1.35008947670393e-05	0.00197838204421605	UP	BCAR1	>FET_vs_Ctrl									>ET_vs_Ctrl
>FET_vs_ET	ENST00000534624	ENSG00000109971	HSPA8	6	399.259	2.8169372938318	6.3389713253487e-05	0.00851214992704927	UP	HSPA8	>FET_vs_Ctrl									>ET_vs_Ctrl	ENST00000534624	ENSG00000109971	HSPA8	424.504	-3.01255538679855	6.00851130290144e-12	1.7111302058787e-09	DOWN
>FET_vs_ET	ENST00000558355	ENSG00000140443	IGF1R	6	2291.25	5.76880318640018	7.65490479703813e-06	0.00115164032959402	UP	IGF1R	>FET_vs_Ctrl	ENST00000558355	ENSG00000140443	IGF1R	2154.1	6.31547860443004	1.69810549272999e-06	0.000152429143734087	UP	>ET_vs_Ctrl
>FET_vs_ET	ENST00000567118	ENSG00000067225	PKM	5	5716.66	-28.4272298903564	3.32474152372971e-23	2.62599722139506e-18	DOWN	PKM	>FET_vs_Ctrl									>ET_vs_Ctrl
>FET_vs_ET	ENST00000577961	ENSG00000176105	YES1	5	1125.75	-4.18978089181525	0.000154175965067657	0.0191769406880651	DOWN	YES1	>FET_vs_Ctrl									>ET_vs_Ctrl
>FET_vs_ET	ENST00000584307	ENSG00000176105	YES1	5	1436.32	-2.3248912436253	8.17097768029616e-05	0.0107562069268612	DOWN	YES1	>FET_vs_Ctrl									>ET_vs_Ctrl
>FET_vs_ET	ENST00000393256	ENSG00000153094	BCL2L11	4	677.142	-2.44150619005153	6.34534543462186e-12	1.27851426310065e-09	DOWN	BCL2L11	>FET_vs_Ctrl	ENST00000393256	ENSG00000153094	BCL2L11	801.776	-2.07636862205661	0.000306582865807406	0.0205203527837614	DOWN	>ET_vs_Ctrl
>FET_vs_ET	ENST00000397091	ENSG00000077782	FGFR1	4	88.386	-5.36383233306267	1.82054787629349e-05	0.00261962110660161	DOWN	FGFR1	>FET_vs_Ctrl									>ET_vs_Ctrl
>FET_vs_ET	ENST00000397108	ENSG00000077782	FGFR1	4	2282.15	-27.2859259876583	1.50645489019673e-22	7.93233865465689e-18	DOWN	FGFR1	>FET_vs_Ctrl									>ET_vs_Ctrl
>FET_vs_ET	ENST00000436743	ENSG00000203747	FCGR3A	4	406.559	2.76859284062109	0.000210662114060872	0.0251341859304032	UP	FCGR3A	>FET_vs_Ctrl									>ET_vs_Ctrl
>FET_vs_ET	ENST00000447182	ENSG00000137575	SDCBP	4	601.512	1.04755280943704	0.000190751205495147	0.0230899583742926	UP	SDCBP	>FET_vs_Ctrl									>ET_vs_Ctrl
>FET_vs_ET	ENST00000504387	ENSG00000111859	NEDD9	4	380.491	5.74387874338277	0.0002792080960524	0.031983803704938	UP	NEDD9	>FET_vs_Ctrl									>ET_vs_Ctrl
>FET_vs_ET	ENST00000532462	ENSG00000100504	PYGL	4	1218.88	24.083198205531	1.67592076489766e-17	9.49292684886034e-14	UP	PYGL	>FET_vs_Ctrl	ENST00000532462	ENSG00000100504	PYGL	1153.91	24.661230039346	4.8993562119886e-18	1.35485249521213e-14	UP	>ET_vs_Ctrl
>FET_vs_ET	ENST00000381075	ENSG00000067057	PFKP	3	3352.71	-3.99737501038285	1.97814292186152e-05	0.00283044658458061	DOWN	PFKP	>FET_vs_Ctrl	ENST00000381075	ENSG00000067057	PFKP	3799.37	-3.78696623791663	0.000199119873311303	0.0138939659807736	DOWN	>ET_vs_Ctrl
>FET_vs_ET	ENST00000392586	ENSG00000112290	WASF1	3	211.078	8.89889439729206	0.000418875222882161	0.0451970371127229	UP	WASF1	>FET_vs_Ctrl									>ET_vs_Ctrl
>FET_vs_ET	ENST00000394464	ENSG00000113580	NR3C1	3	7115	-4.00520315642701	2.40428913399378e-05	0.00340932084048111	DOWN	NR3C1	>FET_vs_Ctrl									>ET_vs_Ctrl
>FET_vs_ET	ENST00000434222	ENSG00000085662	AKR1B1	3	58.7523	6.51153366050597	4.28163660848795e-06	0.00065475052287804	UP	AKR1B1	>FET_vs_Ctrl									>ET_vs_Ctrl
>FET_vs_ET	ENST00000508871	ENSG00000069869	NEDD4	3	535.208	9.84955414295303	0.00019417332065698	0.0233948040117201	UP	NEDD4	>FET_vs_Ctrl									>ET_vs_Ctrl
>FET_vs_ET	ENST00000635305	ENSG00000073712	FERMT2	3	1468.19	11.423018488341	2.45772793752723e-05	0.00347573777177587	UP	FERMT2	>FET_vs_Ctrl									>ET_vs_Ctrl
>FET_vs_ET	ENST00000340149	ENSG00000033327	GAB2	2	5397.97	-4.71200638559022	0.000328526076631071	0.0366758153690321	DOWN	GAB2	>FET_vs_Ctrl									>ET_vs_Ctrl
>FET_vs_ET	ENST00000368315	ENSG00000116584	ARHGEF2	2	1811.48	-3.8614383321079	2.41942021138229e-05	0.00342770002270337	DOWN	ARHGEF2	>FET_vs_Ctrl	ENST00000368315	ENSG00000116584	ARHGEF2	1189.57	-4.11291652095816	4.39998593883963e-103	6.93552183595536e-98	DOWN	>ET_vs_Ctrl
>FET_vs_ET	ENST00000369496	ENSG00000163399	ATP1A1	2	342.515	-4.18164326882495	1.67800387177711e-05	0.00242293635843706	DOWN	ATP1A1	>FET_vs_Ctrl	ENST00000369496	ENSG00000163399	ATP1A1	743.355	-4.51052019649861	7.18092814782328e-05	0.00548401637707748	DOWN	>ET_vs_Ctrl
>FET_vs_ET	ENST00000377533	ENSG00000180900	SCRIB	2	2750.44	-6.77725402030205	2.59336826434706e-12	6.01566232913527e-10	DOWN	SCRIB	>FET_vs_Ctrl	ENST00000377533	ENSG00000180900	SCRIB	2286.47	-5.57815579842731	0.000394356813457327	0.0256439303127164	DOWN	>ET_vs_Ctrl
>FET_vs_ET	ENST00000395913	ENSG00000087586	AURKA	2	73.8254	6.37718415928646	0.00020601644421169	0.0246498829531812	UP	AURKA	>FET_vs_Ctrl									>ET_vs_Ctrl
>FET_vs_ET	ENST00000396659	ENSG00000171766	GATM	2	1335.32	-6.90265382576473	1.06323064205714e-08	1.75869481501404e-06	DOWN	GATM	>FET_vs_Ctrl	ENST00000396659	ENSG00000171766	GATM	1488.03	-5.42588824922751	0.00036943426655166	0.024203011512665	DOWN	>ET_vs_Ctrl
>FET_vs_ET	ENST00000461406	ENSG00000164867	NOS3	2	995.837	5.8096675760908	2.92641759224003e-08	4.80038845060625e-06	UP	NOS3	>FET_vs_Ctrl									>ET_vs_Ctrl
>FET_vs_ET	ENST00000617695	ENSG00000196569	LAMA2	2	36294	10.2250928324061	0.000415993056778016	0.0449782171116036	UP	LAMA2	>FET_vs_Ctrl									>ET_vs_Ctrl
>FET_vs_ET	ENST00000323584	ENSG00000102893	PHKB	1	1073.83	-5.11799806873004	4.83539036437704e-06	0.000735160837044801	DOWN	PHKB	>FET_vs_Ctrl	ENST00000323584	ENSG00000102893	PHKB	1480.81	-4.78264359805517	8.89035835684084e-05	0.00667628216462789	DOWN	>ET_vs_Ctrl
>FET_vs_ET	ENST00000342677	ENSG00000033170	FUT8	1	318.941	9.63833658909974	0.000172077104117389	0.0211716394482811	UP	FUT8	>FET_vs_Ctrl									>ET_vs_Ctrl
>FET_vs_ET	ENST00000419387	ENSG00000093000	NUP50	1	37.4326	4.15795836857382	2.49804736007457e-05	0.00352329506543661	UP	NUP50	>FET_vs_Ctrl									>ET_vs_Ctrl
>FET_vs_ET	ENST00000421544	ENSG00000164418	GRIK2	1	457.231	10.15509020412	8.81231824380533e-05	0.0114761374774872	UP	GRIK2	>FET_vs_Ctrl									>ET_vs_Ctrl
>FET_vs_ET	ENST00000519914	ENSG00000169439	SDC2	1	3870.42	-4.42896965016672	6.0380913001634e-10	1.01040166145436e-07	DOWN	SDC2	>FET_vs_Ctrl	ENST00000519914	ENSG00000169439	SDC2	2529.74	-3.10247327149565	0.000675672037752485	0.0411528132236372	DOWN	>ET_vs_Ctrl
>FET_vs_ET	ENST00000520158	ENSG00000044115	CTNNA1	1	828.595	2.16397914195097	2.3809720346719e-05	0.00337929029111425	UP	CTNNA1	>FET_vs_Ctrl									>ET_vs_Ctrl
>FET_vs_ET	ENST00000545738	ENSG00000072163	LIMS2	1	7003.87	-4.40091852677312	7.13106556969765e-06	0.00107590547741015	DOWN	LIMS2	>FET_vs_Ctrl									>ET_vs_Ctrl	ENST00000545738	ENSG00000072163	LIMS2	6650.77	3.44149096942952	0.000133108433791489	0.0139615742156667	UP
>FET_vs_ET	ENST00000549007	ENSG00000120868	APAF1	1	413.397	9.58026372516892	0.000201514646109899	0.0241705877767976	UP	APAF1	>FET_vs_Ctrl									>ET_vs_Ctrl
>FET_vs_ET	ENST00000552997	ENSG00000135655	USP15	1	89.5274	1.51766335778873	3.92693478716953e-05	0.00540824853988499	UP	USP15	>FET_vs_Ctrl									>ET_vs_Ctrl
>FET_vs_ET	ENST00000553375	ENSG00000185650	ZFP36L1	1	773.614	-11.5656984572083	5.57123389525111e-33	8.80071104731132e-28	DOWN	ZFP36L1	>FET_vs_Ctrl	ENST00000553375	ENSG00000185650	ZFP36L1	366.859	-10.58019092272	8.00757961213764e-09	7.59448101048621e-07	DOWN	>ET_vs_Ctrl
>FET_vs_ET	ENST00000557022	ENSG00000185650	ZFP36L1	1	443.274	-3.17587213144905	0.000117043343452188	0.0149466336581341	DOWN	ZFP36L1	>FET_vs_Ctrl	ENST00000557022	ENSG00000185650	ZFP36L1	168.213	-2.27662575324361	0.00022609128249405	0.0155896170141763	DOWN	>ET_vs_Ctrl
>FET_vs_ET	ENST00000557164	ENSG00000033170	FUT8	1	197.561	7.18844153996883	0.000295766811894652	0.0336367141645518	UP	FUT8	>FET_vs_Ctrl									>ET_vs_Ctrl
>FET_vs_ET	ENST00000602526	ENSG00000106692	FKTN	1	312.827	-2.69430130619475	7.13664900027005e-05	0.00949751501790783	DOWN	FKTN	>FET_vs_Ctrl									>ET_vs_Ctrl
